# Supplementary material
Source: publisher figshare collection journal article supplement (https://gsajournals.figshare.com/ndownloader/files/20183138)
Supplement: Supplementary file 1 [file 20183138]

**Supplementary Table S2. Antibiotic resistance profiles of strain GJ0703.**

| Antibiotica | MICb | Notec |
| --- | --- | --- |
| FOX | 8 | S |
| AZM | 8 | S |
| CHL | 8 | S |
| TET | >32 | R |
| CRO | <=0.25 | S |
| AMC | 8 | S |
| CIP | <=0.015 | S |
| GEN | 0.5 | S |
| NAL | 4 | S |
| TIO | 1 | S |
| FIS | >256 | R |
| SXT | 4 | R |
| AMP | 32 | R |
| STR | 16 | S |

aAbbreviations: GEN, gentamicin; STR, streptomycin; AMC, amoxicillin-clavulanic acid; FOX, cefoxitin; TIO, ceftiofur; CRO, ceftriaxone; AMP, ampicillin; FIS, sulfisoxazole; SXT, trimethoprim-sulfamethoxazole; AZM, azithromycin; CHL, chloramphenicol; CIP, ciprofloxacin; NAL, nalidixic acid; TET, tetracycline.

b minimal inhibit concentration, Unit(mg/liter)

cR: resistant, S: susceptive, I:intermediate
